# Supplementary material
Source: PubMed Central journal article supplement (PMC5559224)
Supplement: NIHMS888311-supplement-Supplemental.pdf [file NIHMS888311-supplement-Supplemental.pdf]

**Supplemental Table 1. Hazard ratios and 95% confidence intervals of HLA alleles, carried by more than one subject, for HIV-1 superinfection risk.**

| HLA Allele | n  | Cox Regression    |         |
|------------|----|-------------------|---------|
|            |    | HR (95% CI)       | p-value |
| HLA_A*01   | 25 | 0.78 (0.12-3.14)  | 0.751   |
| HLA_A*02   | 28 | 0.58 (0.09-2.34)  | 0.475   |
| HLA_A*03   | 27 | 1.27 (0.27-4.58)  | 0.732   |
| HLA_A*11   | 17 | 0.22 (0.00-1.68)  | 0.177   |
| HLA_A*23   | 5  | 2.75 (0.15-14.71) | 0.401   |
| HLA_A*24   | 18 | 1.71 (0.26-6.87)  | 0.520   |
| HLA_A*25   | 3  | 2.12 (0.02-16.49) | 0.642   |
| HLA_A*26   | 6  | 2.02 (0.11-10.92) | 0.544   |
| HLA_A*29   | 10 | 4.10 (0.88-14.76) | 0.069   |
| HLA_A*30   | 9  | 0.37 (0.00-2.92)  | 0.429   |
| HLA_A*31   | 4  | 1.51 (0.08-8.16)  | 0.713   |
| HLA_A*32   | 7  | 3.69 (0.55-15.13) | 0.153   |
| HLA_A*33   | 5  | 0.83 (0.01-6.55)  | 0.898   |
| HLA_A*68   | 17 | 0.88 (0.13-3.54)  | 0.874   |
| HLA_B*07   | 21 | 0.42 (0.02-2.22)  | 0.351   |
| HLA_B*08   | 14 | 0.90 (0.05-4.81)  | 0.917   |
| HLA_B*13   | 10 | 0.47 (0.00-3.65)  | 0.558   |
| HLA_B*14   | 6  | 0.67 (0.01-5.24)  | 0.772   |
| HLA_B*15   | 7  | 0.43 (0.00-3.32)  | 0.502   |
| HLA_B*18   | 11 | 0.32 (0.00-2.47)  | 0.343   |
| HLA_B*27   | 9  | 0.38 (0.00-2.98)  | 0.443   |
| HLA_B*35   | 24 | 4.64 (1.33-18.17) | 0.017   |
| HLA_B*38   | 4  | 3.13 (0.17-17.75) | 0.355   |
| HLA_B*39   | 3  | 1.17 (0.01-9.08)  | 0.918   |
| HLA_B*40   | 10 | 1.06 (0.06-5.64)  | 0.958   |
| HLA_B*44   | 32 | 0.88 (0.19-3.16)  | 0.848   |
| HLA_B*49   | 2  | 1.33 (0.01-10.43) | 0.852   |
| HLA_B*51   | 10 | 0.98 (0.05-5.21)  | 0.982   |
| HLA_B*52   | 2  | 3.99 (0.03-35.35) | 0.435   |
| HLA_B*53   | 2  | 1.71 (0.01-13.32) | 0.732   |
| HLA_B*55   | 2  | 3.13 (0.02-25.75) | 0.505   |
| HLA_B*57   | 13 | 1.65 (0.25-6.60)  | 0.549   |
| HLA_C*01   | 9  | 0.35 (0.00-2.76)  | 0.399   |
| HLA_C*02   | 5  | 0.80 (0.01-6.25)  | 0.877   |
| HLA_C*03   | 16 | 0.60 (0.03-3.17)  | 0.598   |
| HLA_C*04   | 26 | 5.30 (1.51-20.77) | 0.010   |
| HLA_C*05   | 23 | 0.33 (0.02-1.75)  | 0.221   |
| HLA_C*06   | 18 | 0.24 (0.00-1.89)  | 0.221   |
| HLA_C*07   | 45 | 0.74 (0.19-2.60)  | 0.640   |
| HLA_C*08   | 6  | 0.67 (0.01-5.24)  | 0.772   |
| HLA_C*12   | 14 | 0.68 (0.04-3.64)  | 0.703   |
| HLA_C*15   | 5  | 1.78 (0.10-9.50)  | 0.613   |
| HLA_C*16   | 12 | 4.05 (0.87-14.62) | 0.071   |

| HLA Allele  | n  | Cox Regression     |         |
|-------------|----|--------------------|---------|
|             |    | HR (95% CI)        | p-value |
| HLA_C*18    | 2  | 4.96 (0.27-26.52)  | 0.215   |
| HLA-DRB1*01 | 19 | 1.82 (0.39-6.54)   | 0.408   |
| HLA-DRB1*03 | 18 | 0.66 (0.04-3.53)   | 0.676   |
| HLA-DRB1*04 | 36 | 0.76 (0.16-2.72)   | 0.679   |
| HLA-DRB1*07 | 34 | 3.29 (0.94-12.90)  | 0.062   |
| HLA-DRB1*08 | 4  | 15.37 (2.11-79.80) | 0.011   |
| HLA-DRB1*09 | 4  | 1.87 (0.10-9.99)   | 0.585   |
| HLA-DRB1*11 | 24 | 0.13 (0.00-1.03)   | 0.054   |
| HLA-DRB1*13 | 24 | 0.29 (0.02-1.57)   | 0.173   |
| HLA-DRB1*14 | 2  | 2.12 (0.02-16.49)  | 0.642   |
| HLA-DRB1*15 | 15 | 1.17 (0.18-4.68)   | 0.847   |
| HLA-DRB1*16 | 4  | 2.51 (0.14-13.42)  | 0.439   |

n = number of subjects with a given allele; HR = hazard ratio; CI = confidence interval.

**Supplemental Table 2. Homozygosity of HLA loci as a risk factor for HIV-1 superinfection.**

| <b>Cox Regression</b> |                     |                |
|-----------------------|---------------------|----------------|
| <b>HLA Locus</b>      | <b>HR (95% CI)</b>  | <b>p-value</b> |
| <b>HLA-A</b>          | 0.23 (0.002 – 1.80) | 0.202          |
| <b>HLA-B</b>          | 3.57 (0.54 – 14.29) | 0.160          |
| <b>HLA-C</b>          | 0.59 (0.03 – 3.17)  | 0.597          |
| <b>HLA-DRB1</b>       | 0.36 (0.003 – 2.81) | 0.409          |

HR = hazard ratio; CI = confidence interval.

**Supplemental Table 3. Distribution of low- and high-risk HLA alleles for HIV-1 superinfection in monoinfected and superinfected subjects.**

| Contacts per Month<br>Median (Range) | Infection<br>Status | FU<br>Months | HLA-A<br>Allele 1 | HLA-A<br>Allele 2 | HLA-B<br>Allele 1 | HLA-B<br>Allele 2 | HLA-C<br>Allele 1 | HLA-C<br>Allele 2 | HLA-DRB1<br>Allele 1 | HLA-DRB1<br>Allele 2 |
|--------------------------------------|---------------------|--------------|-------------------|-------------------|-------------------|-------------------|-------------------|-------------------|----------------------|----------------------|
| 0 <sup>1</sup>                       | MI                  | 0.7          | *03               | *69               | *35               | *51               | *04               | *16               | *01                  | *11                  |
| 0 (0 - 0)                            | MI                  | 7.5          | *01               | *02               | *08               | *13               | *06               | *07               | *03                  | *07                  |
| 0 (0 - 2)                            | MI                  | 8.0          | *02               | *24               | *35               | *35               | *03               | *04               | *04                  | *04                  |
| 0 (0 - 7)                            | MI                  | 8.4          | *01               | *24               | *35               | *37               | *04               | *06               | *04                  | *11                  |
| 0 (0 - 1)                            | MI                  | 17.7         | *01               | *33               | *08               | *44               | *07               | *07               | *04                  | *13                  |
| 0 (0 - 1)                            | MI                  | 25.8         | *01               | *30               | *08               | *40               | *03               | *07               | *04                  | *15                  |
| 0 (0 - 1)                            | MI                  | 27.0         | *03               | *68               | *07               | *18               | *07               | *12               | *11                  | *13                  |
| 0 (0 - 4)                            | MI                  | 28.8         | *03               | *31               | *07               | *40               | *03               | *07               | *01                  | *14                  |
| 0 (0 - 3)                            | MI                  | 41.4         | *11               | *24               | *35               | *44               | *05               | *12               | *11                  | *16                  |
| 0 (0 - 60)                           | MI                  | 44.3         | *03               | *03               | *07               | *35               | *04               | *07               | *01                  | *04                  |
| 0 (0 - 2)                            | MI                  | 45.1         | *03               | *03               | *07               | *07               | *07               | *07               | *07                  | *15                  |
| 0 (0 - 0)                            | MI                  | 58.4         | *02               | *03               | *07               | *18               | *07               | *07               | *09                  | *13                  |
| 0 (0 - 3)                            | MI                  | 73.9         | *03               | *24               | *07               | *15               | *03               | *07               | *04                  | *13                  |
| 0.5 (0 - 1)                          | MI                  | 18.7         | *01               | *24               | *15               | *18               | *03               | *12               | *11                  | *13                  |
| 0.5 (0 - 1)                          | MI                  | 32.4         | *02               | *23               | *44               | *50               | *05               | *06               | *04                  | *04                  |
| 1 (0 - 2)                            | MI                  | 0.7          | *24               | *30               | *44               | *44               | *04               | *05               | *04                  | *13                  |
| 1 <sup>1</sup>                       | MI                  | 1.8          | *24               | *25               | *07               | *18               | *07               | *12               | *07                  | *15                  |
| 1 <sup>1</sup>                       | MI                  | 2.3          | *29               | *68               | *13               | *44               | *06               | *16               | *29                  | *68                  |
| 1 <sup>1</sup>                       | MI                  | 3.5          | *02               | *29               | *44               | *44               | *05               | *16               | *04                  | *07                  |
| 1 <sup>1</sup>                       | MI                  | 4.4          | *03               | *11               | *35               | *44               | *04               | *04               | *01                  | *07                  |
| 1 <sup>1</sup>                       | MI                  | 5.4          | *02               | *02               | *07               | *57               | *06               | *07               | *01                  | *04                  |
| 1 (1 - 5)                            | MI                  | 8.8          | *03               | *11               | *07               | *14               | *07               | *08               | *01                  | *13                  |
| 1 (1 - 1)                            | MI                  | 10.7         | *01               | *02               | *13               | *57               | *06               | *06               | *07                  | *07                  |
| 1 (1 - 1)                            | MI                  | 12.6         | *24               | *30               | *18               | *55               | *05               | *12               | *07                  | *11                  |
| 1 (0 - 6)                            | MI                  | 12.9         | *02               | *26               | *07               | *51               | *07               | *15               | *13                  | *13                  |
| 1 <sup>1</sup>                       | MI                  | 15.6         | *01               | *11               | *27               | *57               | *01               | *06               | *04                  | *07                  |
| 1 (1 - 2)                            | MI                  | 15.6         | *01               | *68               | *35               | *44               | *04               | *05               | *01                  | *10                  |
| 1 (0 - 1)                            | MI                  | 18.0         | *01               | *32               | *35               | *44               | *02               | *05               | *01                  | *13                  |
| 1 (0 - 3)                            | MI                  | 18.7         | *11               | *68               | *35               | *44               | *04               | *05               | *04                  | *11                  |
| 1 (0 - 2)                            | MI                  | 22.9         | *02               | *68               | *13               | *15               | *03               | *03               | *07                  | *15                  |
| 1 (0 - 30)                           | MI                  | 24.0         | *02               | *02               | *44               | *51               | *05               | *14               | *04                  | *11                  |
| 1 (1 - 4)                            | MI                  | 27.9         | *02               | *03               | *39               | *57               | *06               | *07               | *01                  | *07                  |
| 1 (1 - 2)                            | MI                  | 28.7         | *01               | *03               | *08               | *13               | *06               | *07               | *03                  | *07                  |
| 1 (0 - 2)                            | MI                  | 32.8         | *30               | *30               | *35               | *57               | *04               | *18               | *13                  | *15                  |
| 1 (1 - 2)                            | MI                  | 34.8         | *02               | *02               | *40               | *46               | *01               | *02               | *09                  | *13                  |
| 1 (1 - 1)                            | MI                  | 36.1         | *02               | *02               | *13               | *14               | *07               | *08               | *13                  | *15                  |
| 1 (0 - 3)                            | MI                  | 36.2         | *11               | *68               | *39               | *44               | *05               | *07               | *04                  | *13                  |
| 1 (0 - 1)                            | MI                  | 37.4         | *11               | *68               | *07               | *51               | *01               | *07               | *11                  | *15                  |

| Contacts per Month<br>Median (Range) | Infection<br>Status | FU<br>Months | HLA-A<br>Allele 1 | HLA-A<br>Allele 2 | HLA-B<br>Allele 1 | HLA-B<br>Allele 2 | HLA-C<br>Allele 1 | HLA-C<br>Allele 2 | HLA-DRB1<br>Allele 1 | HLA-DRB1<br>Allele 2 |
|--------------------------------------|---------------------|--------------|-------------------|-------------------|-------------------|-------------------|-------------------|-------------------|----------------------|----------------------|
| 1 (0 - 10)                           | MI                  | 38.2         | *02               | *24               | *07               | *18               | *07               | *07               | *01                  | *11                  |
| 1 (1 - 10)                           | MI                  | 39.0         | *11               | *29               | *44               | *44               | *05               | *16               | *04                  | *07                  |
| 1 (1 - 2)                            | MI                  | 40.3         | *02               | *11               | *15               | *27               | *02               | *03               | *04                  | *04                  |
| 1 (0 - 15)                           | MI                  | 42.1         | *32               | *68               | *40               | *44               | *03               | *07               | *11                  | *15                  |
| 1 (0 - 5)                            | MI                  | 59.2         | *01               | *01               | *15               | *49               | *07               | *12               | *07                  | *13                  |
| 1 (1 - 1)                            | MI                  | 64.0         | *26               | *31               | *07               | *18               | *07               | *07               | *01                  | *11                  |
| 1.5 (1 - 2)                          | MI                  | 8.2          | *02               | *03               | *07               | *44               | *05               | *07               | *04                  | *04                  |
| 1.5 (1 - 2)                          | MI                  | 10.4         | *23               | *23               | *52               | *82               | *03               | *16               | *07                  | *13                  |
| 1.5 (1 - 2)                          | MI                  | 17.8         | *03               | *23               | *44               | *51               | *04               | *04               | *07                  | *09                  |
| 1.5 (1 - 2)                          | MI                  | 34.6         | *02               | *29               | *35               | *49               | *04               | *07               | *04                  | *04                  |
| 1.5 (0 - 20)                         | MI                  | 65.3         | *01               | *03               | *14               | *57               | *06               | *08               | *07                  | *13                  |
| 2 <sup>1</sup>                       | MI                  | 5.9          | *03               | *11               | *07               | *15               | *04               | *07               | *04                  | *08                  |
| 2 <sup>1</sup>                       | MI                  | 14.2         | *11               | *32               | *44               | *51               | *05               | *15               | *11                  | *12                  |
| 2 (1 - 3)                            | MI                  | 14.5         | *01               | *11               | *08               | *57               | *06               | *07               | *03                  | *07                  |
| 2 (0 - 12)                           | MI                  | 17.1         | *03               | *26               | *07               | *38               | *07               | *12               | *15                  | *15                  |
| 2 (0 - 4)                            | MI                  | 17.9         | *30               | *68               | *44               | *51               | *07               | *16               | *07                  | *11                  |
| 2 (1 - 3)                            | MI                  | 20.0         | *03               | *11               | *15               | *35               | *04               | *04               | *01                  | *03                  |
| 2 (0 - 4)                            | MI                  | 28.1         | *30               | *33               | *14               | *53               | *08               | *15               | *03                  | *13                  |
| 2 (1 - 5)                            | MI                  | 28.8         | *02               | *68               | *35               | *44               | *04               | *05               | *04                  | *11                  |
| 2 (1 - 4)                            | MI                  | 41.5         | *11               | *29               | *27               | *44               | *01               | *16               | *01                  | *07                  |
| 2 (0 - 5)                            | MI                  | 42.1         | *01               | *68               | *08               | *44               | *05               | *07               | *03                  | *16                  |
| 3 <sup>1</sup>                       | MI                  | 1.1          | *03               | *23               | *07               | *44               | *04               | *07               | *01                  | *07                  |
| 3 <sup>1</sup>                       | MI                  | 3.4          | *24               | *24               | *40               | *56               | *01               | *03               | *11                  | *16                  |
| 3 <sup>1</sup>                       | MI                  | 6.7          | *02               | *24               | *35               | *44               | *04               | *05               | *03                  | *04                  |
| 3 (0 - 6)                            | MI                  | 6.7          | *02               | *32               | *39               | *40               | *03               | *12               | *04                  | *13                  |
| 3 <sup>1</sup>                       | MI                  | 7.1          | *01               | *02               | *08               | *27               | *01               | *07               | *03                  | *11                  |
| 3 <sup>1</sup>                       | MI                  | 7.8          | *01               | *11               | *08               | *57               | *06               | *07               | *03                  | *07                  |
| 3 (2 - 4)                            | MI                  | 9.5          | *25               | *68               | *40               | *44               | *03               | *05               | *04                  | *15                  |
| 3 (3 - 5)                            | MI                  | 24.1         | *03               | *03               | *13               | *35               | *04               | *06               | *01                  | *15                  |
| 3 (2 - 4)                            | MI                  | 32.7         | *30               | *30               | *18               | *35               | *04               | *05               | *03                  | *13                  |
| 3 (1 - 5)                            | MI                  | 53.7         | *02               | *68               | *27               | *44               | *01               | *05               | *04                  | *11                  |
| 3.5 (2 - 5)                          | MI                  | 19.5         | *01               | *30               | *08               | *13               | *06               | *07               | *03                  | *07                  |
| 4 <sup>1</sup>                       | MI                  | 2.6          | *02               | *03               | *07               | *13               | *06               | *07               | *02                  | *03                  |
| 4 (1 - 7)                            | MI                  | 6.3          | *32               | *68               | *44               | *57               | *07               | *16               | *03                  | *07                  |
| 4 (3 - 9)                            | MI                  | 10.8         | *01               | *02               | *07               | *40               | *03               | *07               | *04                  | *15                  |
| 4 (4 - 5)                            | MI                  | 21.4         | *01               | *29               | *27               | *44               | *01               | *16               | *04                  | *07                  |
| 5 <sup>1</sup>                       | MI                  | 0.7          | *01               | *03               | *07               | *08               | *07               | *07               | *03                  | *13                  |
| 5 (0 - 10)                           | MI                  | 5.2          | *01               | *26               | *08               | *38               | *07               | *12               | *03                  | *04                  |
| 5 (0 - 50)                           | MI                  | 41.5         | *25               | *68               | *18               | *57               | *06               | *12               | *13                  | *13                  |
| 5.5 (5 - 8)                          | MI                  | 13.7         | *30               | *33               | *53               | *53               | *04               | *04               | *11                  | *11                  |
| 6 <sup>1</sup>                       | MI                  | 2.9          | *11               | *24               | *18               | *35               | *04               | *05               | *03                  | *13                  |

| Contacts per Month<br>Median (Range) | Infection<br>Status | FU<br>Months | HLA-A<br>Allele 1 | HLA-A<br>Allele 2 | HLA-B<br>Allele 1 | HLA-B<br>Allele 2 | HLA-C<br>Allele 1 | HLA-C<br>Allele 2 | HLA-DRB1<br>Allele 1 | HLA-DRB1<br>Allele 2 |
|--------------------------------------|---------------------|--------------|-------------------|-------------------|-------------------|-------------------|-------------------|-------------------|----------------------|----------------------|
| 6.5 (3 - 10)                         | MI                  | 7.4          | *03               | *03               | *14               | *27               | *02               | *08               | *04                  | *13                  |
| 7 <sup>1</sup>                       | MI                  | 4.6          | *03               | *24               | *40               | *51               | *03               | *07               | *04                  | *11                  |
| 7 (2 - 12)                           | MI                  | 8.8          | *24               | *29               | *08               | *27               | *02               | *07               | *03                  | *04                  |
| 12.5 (10 - 15)                       | MI                  | 6.4          | *01               | *33               | *14               | *52               | *08               | *12               | *01                  | *15                  |
| 15 <sup>1</sup>                      | MI                  | 2.3          | *02               | *26               | *13               | *44               | *05               | *06               | *04                  | *07                  |
| 30 <sup>1</sup>                      | MI                  | 9.6          | *01               | *24               | *18               | *57               | *06               | *12               | *07                  | *11                  |
| NA                                   | MI                  | 7.3          | *03               | *11               | *51               | *55               | *03               | *15               | *03                  | *14                  |
| NA                                   | MI                  | 12.0         | *24               | *33               | *35               | *38               | *07               | *12               | *04                  | *11                  |
| NA                                   | MI                  | 62.0         | *02               | *31               | *27               | *44               | *01               | *05               | *04                  | *11                  |
| 0 (0 - 1)                            | SI                  | 11.2         | *26               | *32               | *07               | *38               | *07               | *12               | *09                  | *15                  |
| 1 (1 - 3)                            | SI                  | 19.9         | *01               | *68               | *35               | *57               | *07               | *07               | *04                  | *07                  |
| 1 (1 - 4)                            | SI                  | 21.1         | *24               | *31               | *35               | *51               | *04               | *15               | *04                  | *07                  |
| 2 <sup>1</sup>                       | SI                  | 3.4          | *24               | *66               | *35               | *41               | *04               | *17               | *13                  | *15                  |
| 2 (1 - 3)                            | SI                  | 16.9         | *02               | *29               | *44               | *44               | *05               | *16               | *01                  | *07                  |
| 4 <sup>1</sup>                       | SI                  | 4.6          | *23               | *29               | *44               | *44               | *04               | *16               | *04                  | *07                  |
| 5 <sup>1</sup>                       | SI                  | 3.8          | *01               | *03               | *08               | *35               | *04               | *07               | *01                  | *03                  |
| 6.5 (3 - 10)                         | SI                  | 10.9         | *02               | *68               | *35               | *40               | *03               | *04               | *08                  | *16                  |
| 8 <sup>1</sup>                       | SI                  | 5.5          | *03               | *29               | *44               | *57               | *16               | *18               | *01                  | *07                  |
| NA                                   | SI                  | 9.8          | *03               | *32               | *35               | *47               | *04               | *07               | *07                  | *08                  |

FU, follow-up; MI, mono-infection; SI, superinfection; NA, not available; <sup>1</sup>only one data point available; blue, low-risk HLA allele; red, high-risk HLA allele. Contact numbers are median (range) values during the follow-up period.

**Supplemental Table 4. Linkage disequilibrium between HLA loci.**

| <b>Locus 1</b> | <b>Locus 2</b> | <b>n</b> | <b>ChiSq</b> | <b>DF</b> | <b>p-value</b> |
|----------------|----------------|----------|--------------|-----------|----------------|
| HLA-A          | HLA-B          | 98       | 637.505      | 360       | <0.0001        |
| HLA-A          | HLA-C          | 98       | 347.880      | 195       | <0.0001        |
| HLA-A          | HLA-DRB1       | 98       | 229.068      | 225       | 0.412          |
| HLA-B          | HLA-C          | 98       | 768.775      | 312       | <0.0001        |
| HLA-B          | HLA-DRB1       | 98       | 414.794      | 360       | 0.024          |
| HLA-C          | HLA-DRB1       | 98       | 212.030      | 195       | 0.192          |

n = number of subjects; ChiSq = Chi-square test; DF = degrees of freedom.
